# Supplementary material for: Inhibition of type 1 fimbriae-mediated Escherichia coli adhesion and biofilm formation by trimeric cluster thiomannosides conjugated to diamond nanoparticles
Source: Royal Society of Chemistry journal article supplement (doi:10.1039/c4nr05906a), 2014-12-19
Supplement: c4nr05906a1.pdf [file c4nr05906a1.pdf]

## SUPPLEMENTARY INFORMATION

### **Inhibition of type 1 fimbriae-mediated *Escherichia coli* adhesion and biofilm formation by trimeric cluster thiomannosides conjugated to diamond nanoparticles**

Manakamana Khanal,<sup>a,#</sup> Fanny Larssonneur,<sup>b,c,#</sup> Victoriia Raks,<sup>d,e</sup> Alexandre Barras,<sup>a</sup> Jean-Sébastien Baumann,<sup>f</sup> Fernando Ariel Martin,<sup>b</sup> Rabah Boukherroub,<sup>a</sup> Jean-Marc Ghigo,<sup>b</sup> Carmen Ortiz Mellet,<sup>c</sup> Vladimir Zaitsev,<sup>c,g</sup> Jose M. Garcia Fernandez,<sup>h</sup> Christophe Beloin,<sup>b,\*</sup> Aloysius Siriwardena,<sup>f,\*</sup> Sabine Szunerits,<sup>a,\*</sup>

<sup>a</sup> *Institut de Recherche Interdisciplinaire (IRI, USR CNRS 3078), Université Lille 1, Parc de la Haute Borne, 50 Avenue de Halley, BP 70478, 59658 Villeneuve d'Ascq, France.*

<sup>b</sup> *Institut Pasteur, Unité de Génétique des Biofilms, 28 rue du Dr. Roux, 75724 Paris cedex 15, France.*

<sup>c</sup> *Université Paris Diderot, Ecole Doctorale Bio Sorbonne Paris Cité (BioSPC), Cellule Pasteur, rue du Dr. Roux, 75724 Paris cedex 15, France.*

<sup>d</sup> *Taras Shevchenko University, 60 Vladimirska str., Kiev, Ukraine*

<sup>e</sup> *Departamento de Química Orgánica, Facultad de Química, Universidad de Sevilla, c/ Profesor García González, 41012 Sevilla, Spain.*

<sup>f</sup> *Laboratoire de Glycochimie des Antimicrobiens et des Agroressources (FRE 3517 CNRS), Université de Picardie Jules Vernes, 33 Rue St Leu, 80039 Amiens, France.*

<sup>g</sup> *Chemistry Department, Pontifical Catholic University of Rio de Janeiro, Rua Marques de Sao Vicente, 225-Gavea, Rio de Janeiro, 22451-900, Brazil*

<sup>h</sup> *Investigaciones Químicas (IIQ), CSIC – Universidad de Sevilla, Avda. Américo Vespucio 49, 41092 Sevilla, Spain*

---

# these authors contributed equally to the work

\* to whom correspondence should be sent: [cbeloin@pasteur.fr](mailto:cbeloin@pasteur.fr); [aloyusius.siriwardena@u-picardie.fr](mailto:aloyusius.siriwardena@u-picardie.fr); [Sabine.Szunerits@iri.univ-lille1.fr](mailto:Sabine.Szunerits@iri.univ-lille1.fr);

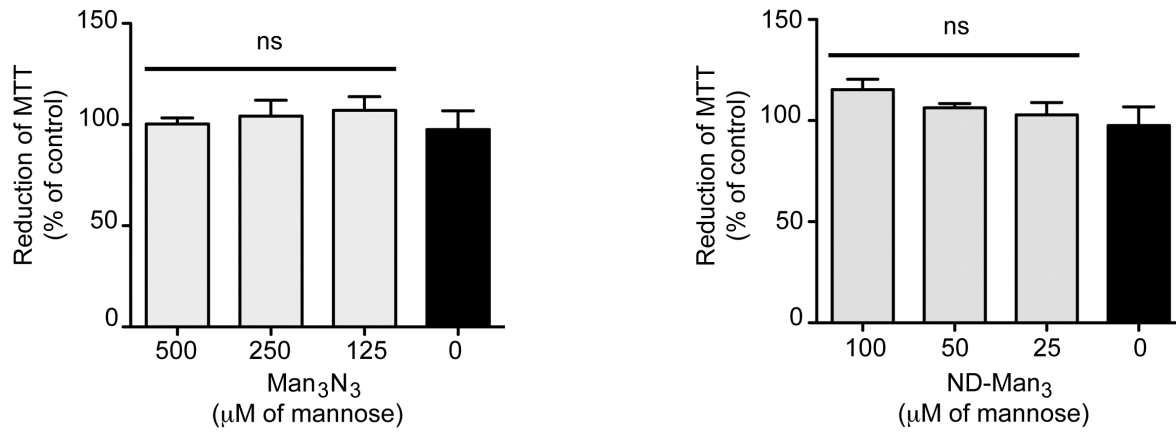

**Figure S1** : Toxicity of ND-Man<sub>3</sub> and Man<sub>3</sub>N<sub>3</sub> on T24 bladder epithelial cells. T24 cells were incubated with increasing concentration of the different anti-adhesive compounds for 24 H. None of the compounds tested affected the T24 proliferation measured as the diminution of MTT. The graph are represented in percentage of the control cells that were incubated only with growth medium. Statistical differences were evaluated using one-way ANOVA included in Graphpad Prism Version.

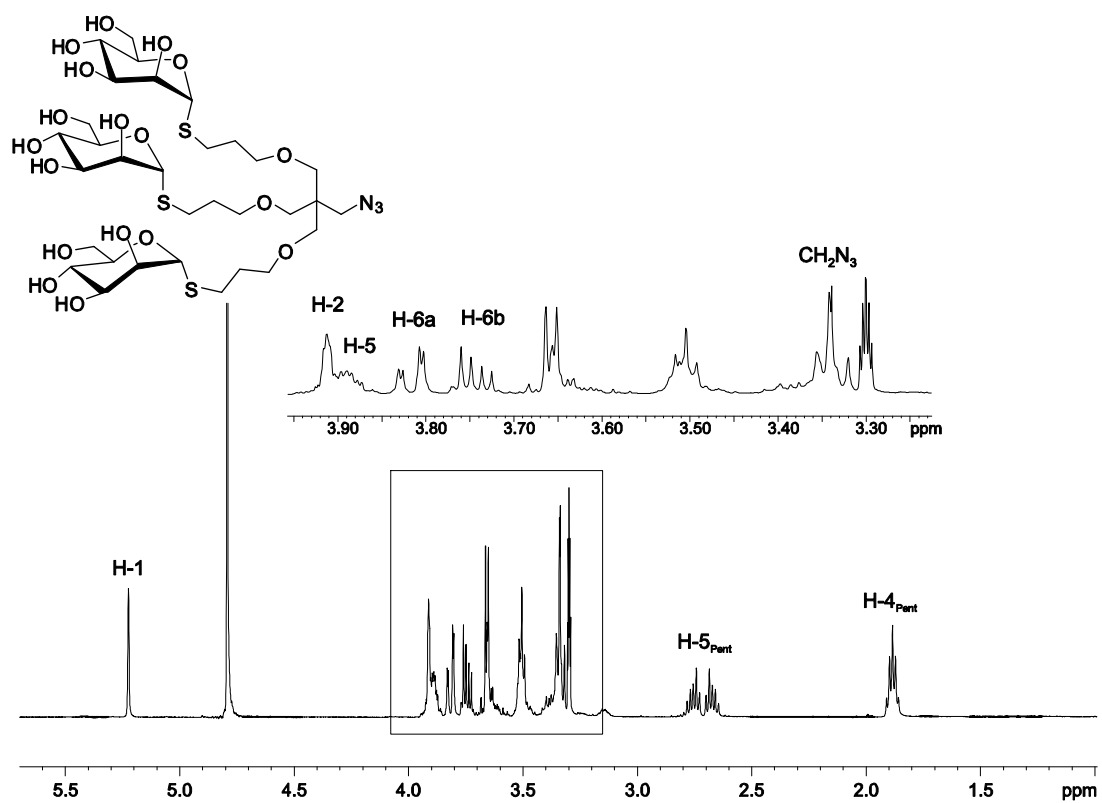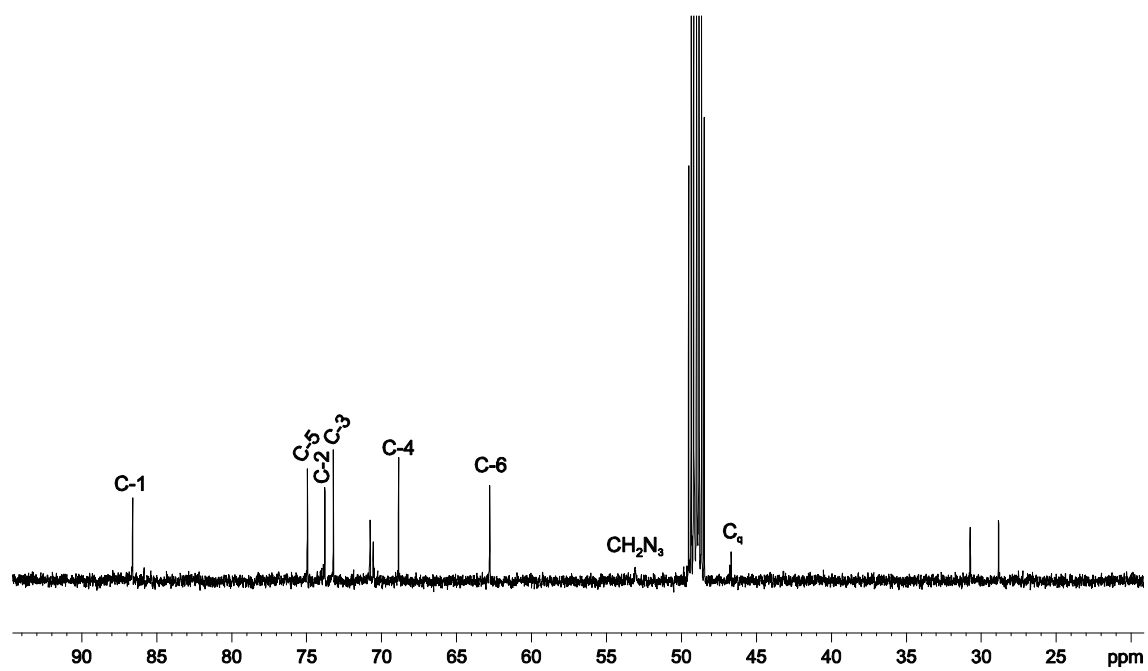

**Figure S2**  $^1\text{H}$  NMR (above) and  $^{13}\text{C}$  NMR spectra (500 MHz, 125.7 MHz,  $\text{CD}_3\text{OD}$ ) of compound  $\text{Man}_3\text{N}_3$ .

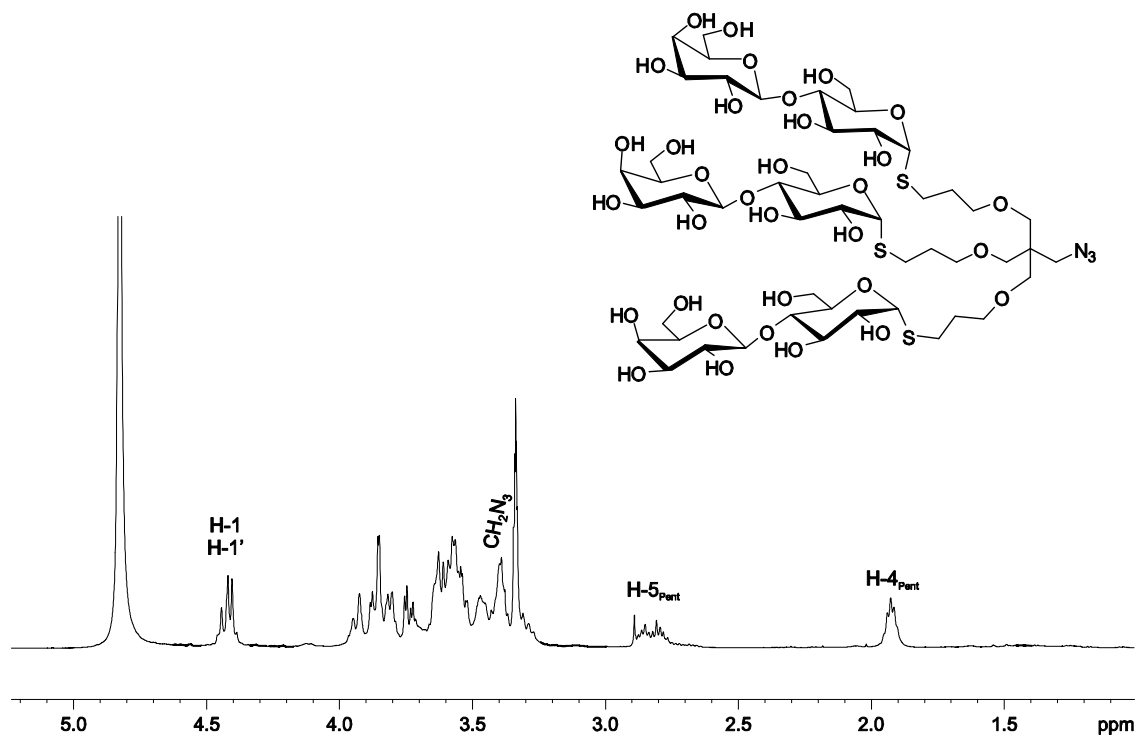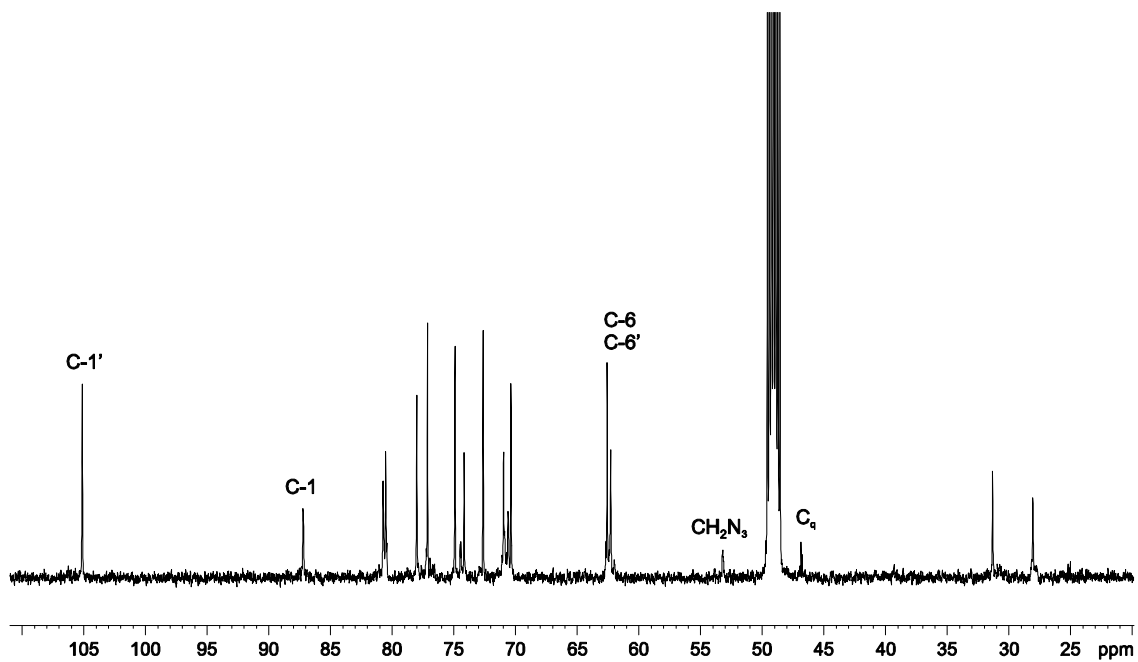

**Figure S3.** <sup>1</sup>H NMR (above) and <sup>13</sup>C NMR spectra (500 MHz, 125.7 MHz, CD<sub>3</sub>OD) of compound Lac<sub>3</sub>N<sub>3</sub>.

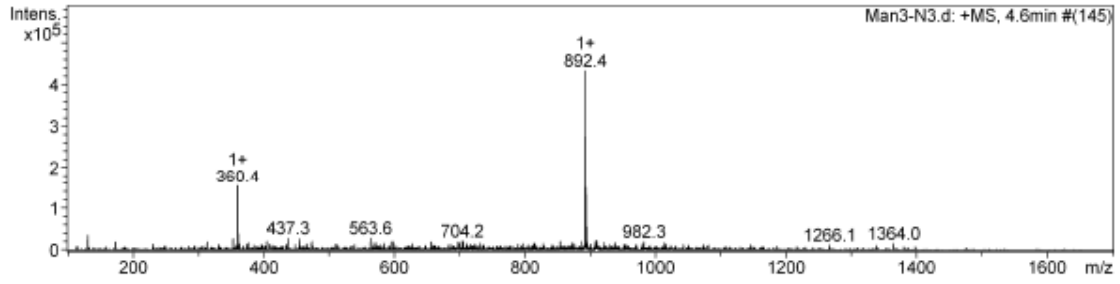

Figure S4. ESIMS spectrum of  $\text{Man}_3\text{N}_3$ .

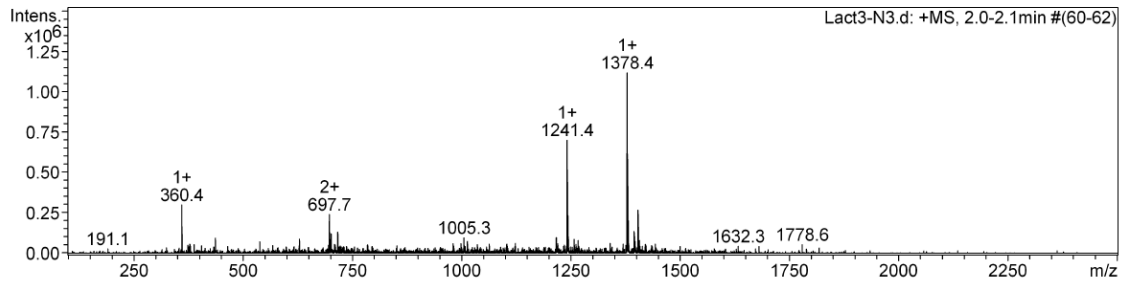

Figure S5. ESIMS spectrum of  $\text{Lac}_3\text{N}_3$ .
